# Supplementary material for: The Views and Needs of People With Parkinson Disease Regarding Wearable Devices for Disease Monitoring: Mixed Methods Exploration
Source: PubMed Central journal article supplement (PMC8778562; doi:10.2196/27418), 2022-01-06
Supplement: formative_v6i1e27418_app2.pdf [file formative_v6i1e27418_app2.pdf]

## Appendix 2

### Interview Schedule for focus group

1. What is important to you in your day-to-day life?
2. What 'outcomes' should researchers focus on in studies with Parkinson's Disease?
3. What do you think of technology in general? Do you use it a lot?
4. What would be the benefits of technology for a person with Parkinson's Disease?
5. What do you think should be important design features? Participants were shown some examples of existing wearable devices (smart watch: which captures information about step count, distance, heart rate, calories burned, sleep, and glove prototype: which measures tremor, finger stiffness, and speed of movement).
6. Any potential barriers to technology?
